# Supplementary material
Source: publisher figshare collection journal article supplement (https://frontiersin.figshare.com/ndownloader/files/27850734)
Supplement: Supplementary file 1 [file 27850734]

| **Speakers** | load-bearing location | load-sharing location | explanatory | totals |
| --- | --- | --- | --- | --- |
| 1 | 14 | 6 | 16 | 36 |
| 2 | 15 | 8 | 20 | 43 |
| 3 | 10 | 16 | 22 | 48 |
| 4 | 6 | 21 | 20 | 47 |
| 5 | 0 | 16 | 14 | 30 |
| 6 | 0 | 10 | 10 | 20 |
| 7 | 16 | 0 | 16 | 32 |
| 8 | 17 | 2 | 10 | 29 |
| 9 | 3 | 16 | 19 | 38 |
| 10 | 0 | 16 | 20 | 36 |
| 11 | 5 | 8 | 14 | 27 |
| 12 | 22 | 27 | 14 | 63 |
| *totals* | *108* | *146* | *195* | ***449*** |
|  |  |  |  |  |
| **Signers** |  |  |  |  |
| 1 | 27 | 0 | 13 | 40 |
| 2 | 48 | 0 | 6 | 54 |
| 3 | 3 | 29 | 10 | 42 |
| 4 | 2 | 33 | 13 | 48 |
| 5 | 0 | 5 | 3 | 8 |
| 6 | 1 | 18 | 15 | 34 |
| 7 | 11 | 18 | 15 | 44 |
| 8 | 14 | 20 | 26 | 60 |
| 9 | 1 | 32 | 12 | 45 |
| 10 | 2 | 22 | 41 | 65 |
| 11 | 15 | 7 | 12 | 34 |
| 12 | 6 | 10 | 14 | 30 |
| *totals* | *130* | *194* | *180* | ***504*** |

**Table S1. Counts of points by semantic function and participant**

*Note*: Following the semantic integration analyses in the main text, this table excludes points that bridge over utterances.
